# Supplementary material for: Eliminating chemo-mechanical degradation of lithium solid-state battery cathodes during >4.5 V cycling using amorphous Nb2O5 coatings
Source: PubMed Central journal article supplement (PMC11599776; doi:10.1038/s41467-024-54331-w), 2024-11-26
Supplement: 41467_2024_54331_MOESM1_ESM.pdf [file 41467_2024_54331_MOESM1_ESM.pdf]

## Supporting information file

### **Eliminating chemo-mechanical degradation of lithium solid-state battery cathodes during >4.5V cycling using amorphous Nb<sub>2</sub>O<sub>5</sub> coatings**

Manoj K. Jangid<sup>1,2#</sup>, Tae H. Cho<sup>1,#</sup>, Tao Ma<sup>3</sup>, Daniel W. Liao<sup>1</sup>, Hwangsun Kim<sup>2,4</sup>, Younggyu Kim<sup>1,2</sup>, Miaofang Chi<sup>2,4</sup>, Neil P. Dasgupta<sup>1,2,5\*</sup>

<sup>1</sup> Department of Mechanical Engineering, University of Michigan, Ann Arbor, Michigan 48109, United States.

<sup>2</sup> MUSIC DOE Energy Frontier Research Center, University of Michigan, Ann Arbor, MI 48109, United States

<sup>3</sup> Michigan Center for Materials Characterization, University of Michigan, Ann Arbor, Michigan 48109, United States.

<sup>4</sup> Center for Nanophase Materials Sciences (CNMS), Oak Ridge National Laboratory, Oak Ridge, Tennessee 37831, United States.

<sup>5</sup> Department of Materials Science & Engineering, University of Michigan, Ann Arbor, Michigan 48109, United States.

# These authors contributed equally: Manoj K. Jangid, Tae H. Cho

\*Corresponding author: ndasgupt@umich.edu

---

| Table/<br>Figure | Description                                                                                                                                                                                  | Page<br>No. |
|------------------|----------------------------------------------------------------------------------------------------------------------------------------------------------------------------------------------|-------------|
| Table S1         | XPS Elemental composition from uncoated and Nb <sub>2</sub> O <sub>5</sub> coated powders                                                                                                    | 3           |
| Figure S1        | Rotary bed ALD process schematics                                                                                                                                                            | 4           |
| Figure S2        | STEM-EDS near the (sub)surface of Nb <sub>2</sub> O <sub>5</sub> coated NMC particle                                                                                                         | 5           |
| Figure S3        | XPS C 1s core scan from Nb <sub>2</sub> O <sub>5</sub> -coated SC-NMC powder                                                                                                                 | 6           |
| Figure S4        | Ni 2p, Mn 2p and Co 2p XPS scans from uncoated and Nb <sub>2</sub> O <sub>5</sub> -coated powders                                                                                            | 7           |
| Figure S5        | Li 1s, Ni 3p, Mn 3p, Co 3p and Nb 4s XPS scans from uncoated and Nb <sub>2</sub> O <sub>5</sub> -coated NMC powders                                                                          | 8           |
| Figure S6        | XRD scans of uncoated and Nb <sub>2</sub> O <sub>5</sub> -coated NMC cathodes. XPS 3d and O 1s spectra of Nb <sub>2</sub> O <sub>5</sub> -coated NMC powder with and without sputtering      | 9           |
| Figure S7        | Cross-sectional view of a densified LTO SE NMC cell                                                                                                                                          | 10          |
| Table S2         | Theoretical capacities, actual capacities and corresponding weights of composite powders used for cell fabrication                                                                           | 11          |
| Figure S8        | Voltage profiles and corresponding dQ/dV plots at different cutoff voltages during the first formation cycle for uncoated and Nb <sub>2</sub> O <sub>5</sub> -coated SC-NMC cathodes         | 12          |
| Table S3         | Coulombic efficiency of uncoated and Nb <sub>2</sub> O <sub>5</sub> -coated SC-NMC cathode samples cycled to different cutoff voltage during the formation cycles                            | 13          |
| Figure S9        | Voltage profiles at different C-rates for uncoated and Nb <sub>2</sub> O <sub>5</sub> coated SC-NMC cathodes cycled at different cutoff voltages                                             | 14          |
| Figure S10       | Cyclic voltammogram of a Li Li <sub>6</sub> PS <sub>5</sub> Cl SS blocking electrode                                                                                                         | 15          |
| Figure S11       | Rate capability trends of uncoated, ALD Nb <sub>2</sub> O <sub>5</sub> -coated, and solution-processed LiNbO <sub>3</sub> coated SC-NMC composite cathodes at 4.3 V and 4.7 V voltage limits | 16          |
| Figure S12       | Rate capability dQ/dV vs V plots of uncoated and Nb <sub>2</sub> O <sub>5</sub> -coated cathodes cycled at different voltage limits                                                          | 17          |
| Figure S13       | Intermittent EIS measurement at different charging voltage points and total interfacial impedance for uncoated and Nb <sub>2</sub> O <sub>5</sub> -coated cathodes                           | 18          |
| Figure S14       | Equivalent circuit used for fitting the Nyquist plots                                                                                                                                        | 19          |
| Table S4         | Fitted impedance components                                                                                                                                                                  | 19          |
| Figure S15       | GITT experiments and estimated internal resistance for uncoated and Nb <sub>2</sub> O <sub>5</sub> -coated cathodes                                                                          | 20          |
| Figure S16       | Coulombic efficiency of Nb <sub>2</sub> O <sub>5</sub> -coated SC-NMC cathodes at a 1C rate cycled with a 4.7 V limit using CC and CCCV protocols                                            | 21          |
| Figure S17       | <i>Ex-situ</i> XRD scans from uncoated and Nb <sub>2</sub> O <sub>5</sub> -coated SC-NMC cathodes before the cycling and after the rate capability tests                                     | 22          |
| Figure S18       | Intensity line profiles on TEM images of uncoated and Nb <sub>2</sub> O <sub>5</sub> -coated samples cycled for 500 cycles at a 1C rate with a 4.7 V limit                                   | 23          |
| Figure S19       | XPS core scans corresponding to Nb 3d peak and O 1s peak of Nb <sub>2</sub> O <sub>5</sub> -coated SC-NMC powders before and after cycling                                                   | 24          |
| Figure S20       | FIB-SEM cross-section images of Nb <sub>2</sub> O <sub>5</sub> -coated SC-NMC electrodes before cycling and after 500 cycles tested at a 4.7 V limit                                         | 25          |
| Table S5         | Comparison of electrochemical performance of layered cathode materials having different coatings in solid electrolyte and liquid electrolyte systems                                         | 26          |
| Table S6         | List of abbreviations used in the study                                                                                                                                                      | 28          |
|                  | Supplementary References                                                                                                                                                                     | 29          |

Table S1: Elemental composition estimated by XPS on uncoated and Nb<sub>2</sub>O<sub>5</sub> coated particle powders:

|                                | Li    | Ni   | Mn   | Co   | Nb    | O     |
|--------------------------------|-------|------|------|------|-------|-------|
| Uncoat                         | 17.64 | 2.99 | 2.14 | 1.14 | -     | 36.79 |
| Nb <sub>2</sub> O <sub>5</sub> | 1.95  | -    | -    | -    | 17.98 | 40.82 |

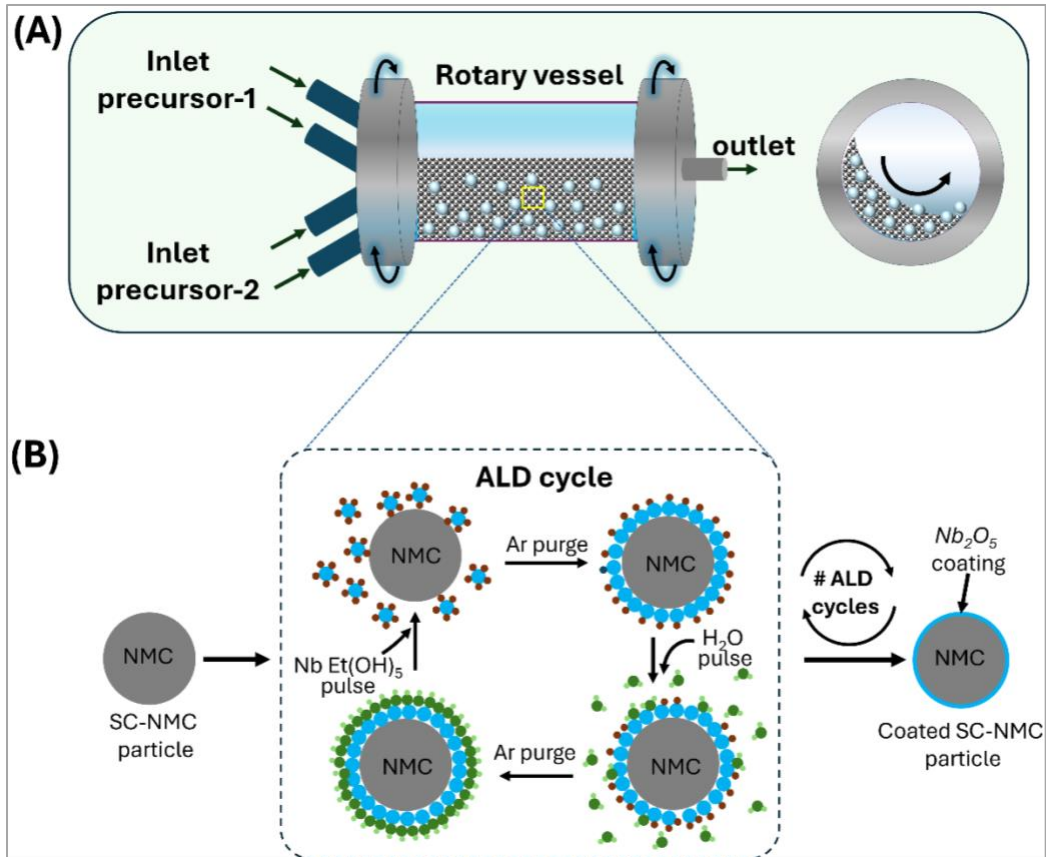

Figure S1: (A) Schematic of the ALD chamber with a rotary-bed attachment for conformal ALD coating at the particle scale on powders. (B) Schematic of the ALD process of  $Nb_2O_5$  coating on an individual single-crystal NMC532 particle in the ALD chamber.

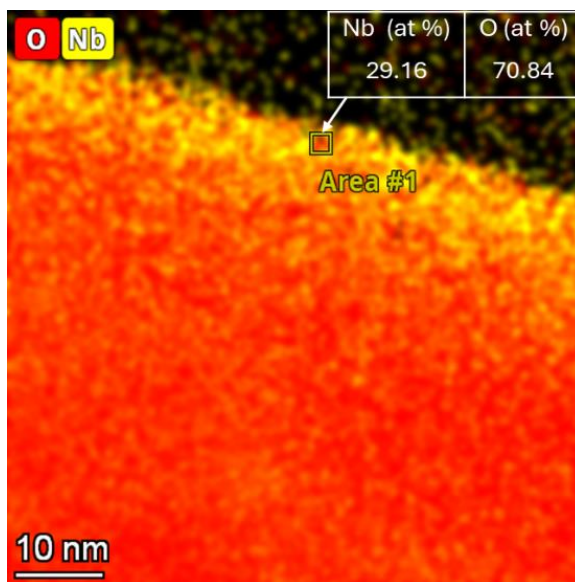

Figure S2: STEM-EDS elemental point scan showing Nb and O distributions near the (sub)surface of Nb<sub>2</sub>O<sub>5</sub> coated NMC particle.

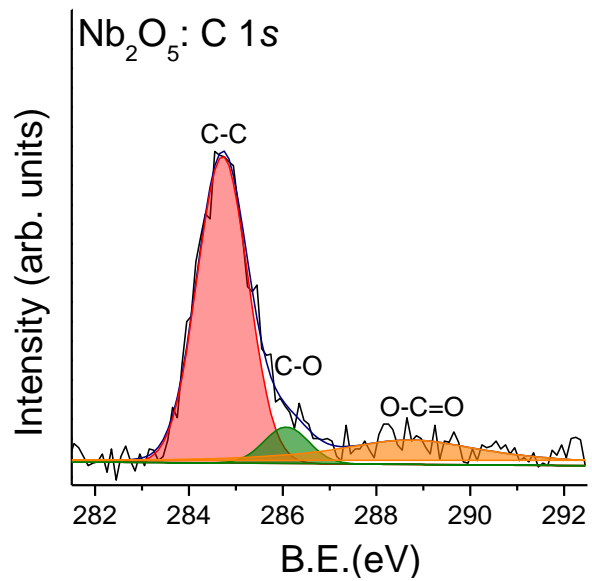

Figure S3: XPS C 1s core scan from Nb<sub>2</sub>O<sub>5</sub>-coated SC-NMC powder showing adventitious carbon.

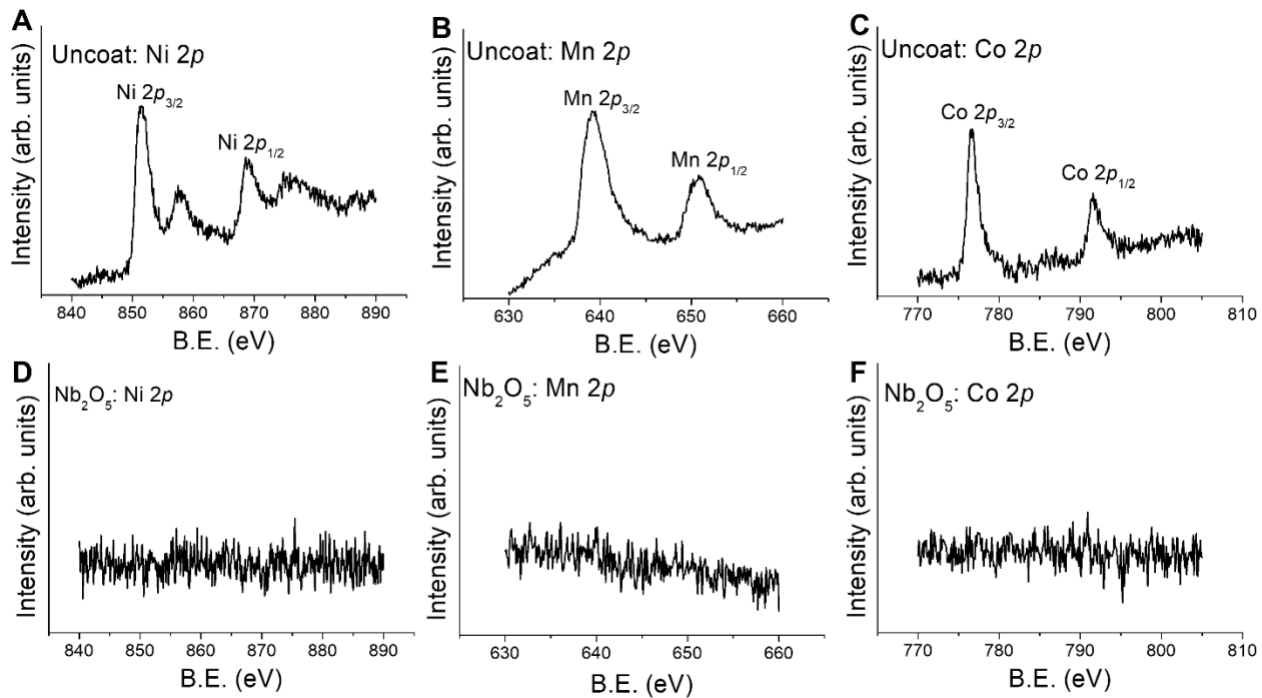

Figure S4: XPS core scans of Ni 2p, Mn 2p and Co 2p in (A-C) uncoated and (D-F) Nb<sub>2</sub>O<sub>5</sub>-coated SC-NMC powders.

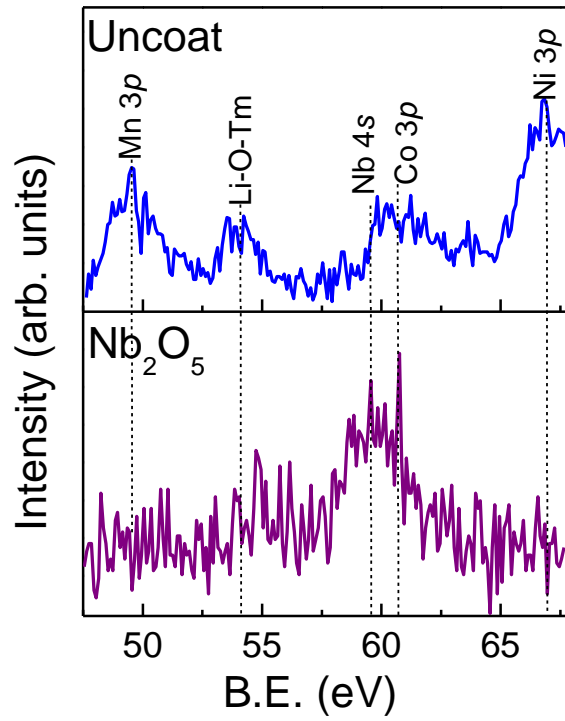

Figure S5: XPS Li 1s, Ni 3p, Mn 3p, Co 3p and Nb 4s core scans from uncoated and Nb<sub>2</sub>O<sub>5</sub>-coated NMC powders showing no evidence of LiNbO<sub>x</sub> formation in Nb<sub>2</sub>O<sub>5</sub>-coated NMC powder.



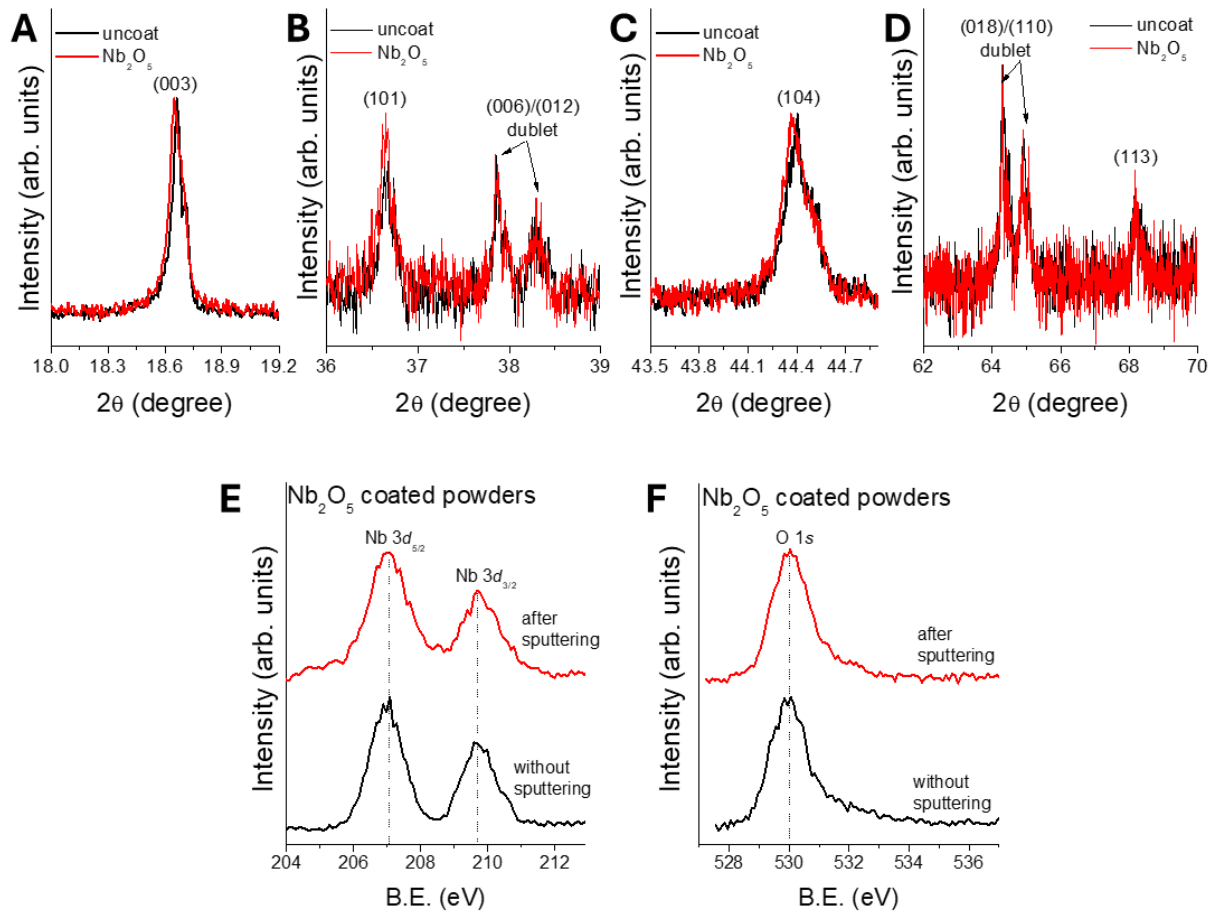

Figure S6: (A-D) Comparison of the positions of various peaks in XRD scans from uncoated and Nb<sub>2</sub>O<sub>5</sub>-coated NMC cathodes. (E-F) Comparison of the XPS 3d and O 1s spectra of Nb<sub>2</sub>O<sub>5</sub>-coated NMC powder with and without sputtering.

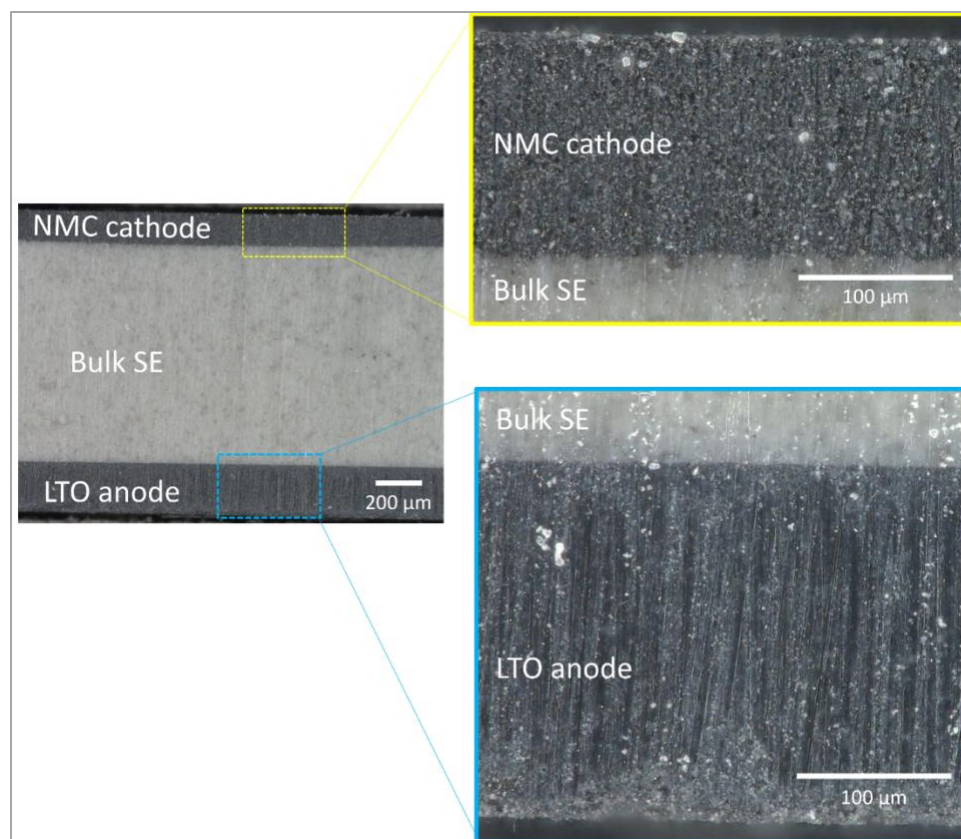

Figure S7: Cross-sectional view of a densified cell (LTO|SE|NMC pellet) with zoomed-in views of the anode (bottom) and cathode (top).

**Table S2:** Details of theoretical capacities considered in the study, actual capacities loaded in the electrodes and corresponding weights of composite powders used in composite electrodes:

| Voltage range vs. LTO (vs. Li) | Theoretical accessible capacity (mAh·g <sup>-1</sup> ) | Actual capacities (mAh·cm <sup>-2</sup> ) of anode and cathode to maintain N/P= 1.1 | Weight (g) of composite powders |         |
|--------------------------------|--------------------------------------------------------|-------------------------------------------------------------------------------------|---------------------------------|---------|
|                                |                                                        |                                                                                     | anode                           | cathode |
| 1.45-2.75 V (3.0-4.3 V)        | SC-NMC =165<br>LTO = 155                               | Anode= 3.30<br>Cathode= 3.00                                                        | 0.0137                          | 0.0081  |
| 1.45-2.95 V (3.0-4.5 V)        | SC-NMC =185<br>LTO = 155                               | Anode= 3.70<br>Cathode= 3.36                                                        | 0.0149                          | 0.0081  |
| 1.45-3.15 V (3.0-4.7 V)        | SC-NMC =205<br>LTO = 155                               | Anode= 4.10<br>Cathode= 3.73                                                        | 0.0163                          | 0.0081  |

The theoretical capacity of NMC cathode considered in the present study were adopted from Zhang *et al.* (2020) <sup>1</sup>.

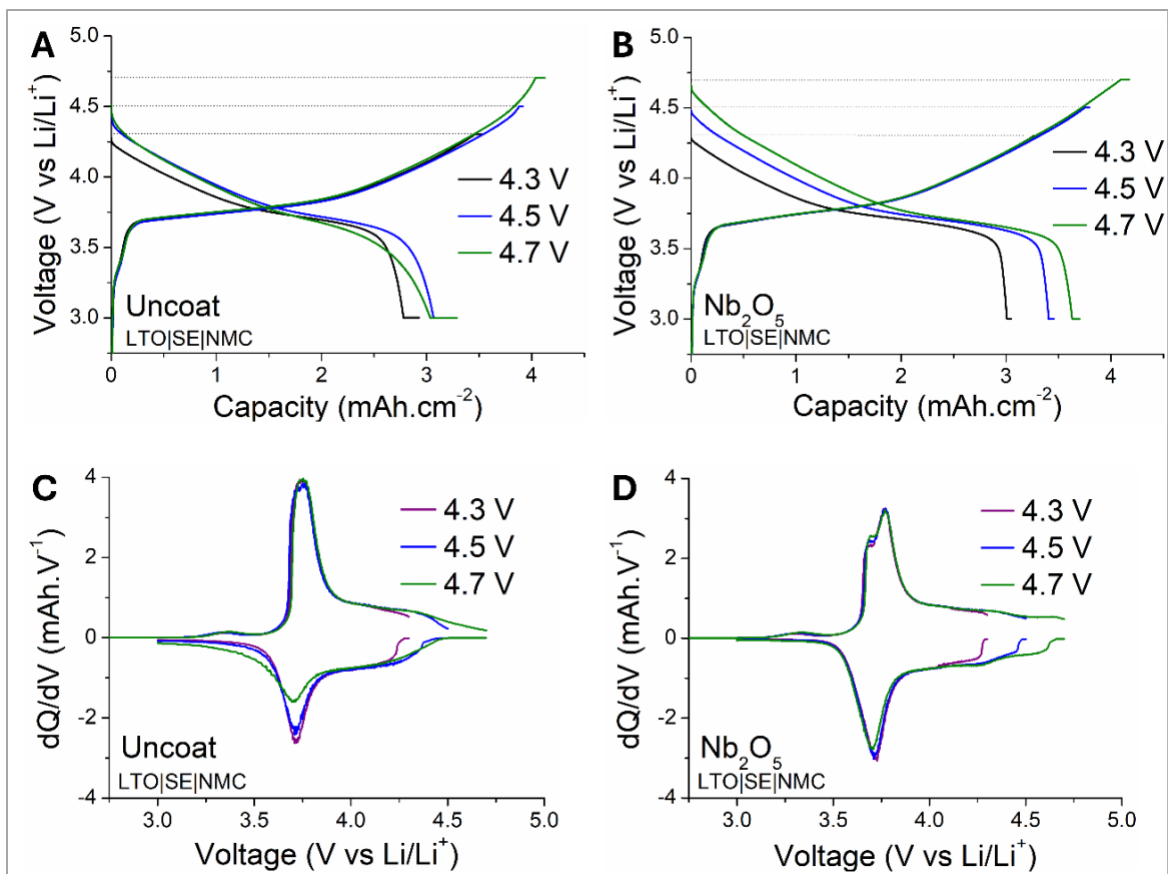

Figure S8: Voltage profiles and corresponding  $dQ/dV$  plots at different cutoff voltages during the first formation cycle for (A,C) uncoated and (B,D) Nb<sub>2</sub>O<sub>5</sub>-coated SC-NMC composite cathodes (LTO|SE|NMC), respectively.

**Table S3:** Coulombic efficiency of uncoated and Nb<sub>2</sub>O<sub>5</sub>-coated SC-NMC cathode samples (LTO|SE|NMC) cycled to different cutoff voltages during the formation cycles:

|                                | Formation cycle | Coulombic efficiency at different voltage limit (as %) |       |       |
|--------------------------------|-----------------|--------------------------------------------------------|-------|-------|
|                                |                 | 4.3 V                                                  | 4.5 V | 4.7 V |
| Uncoat                         | 1 <sup>st</sup> | 83.1                                                   | 83.0  | 79.7  |
|                                | 2 <sup>nd</sup> | 98.2                                                   | 97.6  | 97.1  |
|                                | 3 <sup>rd</sup> | 99.0                                                   | 98.4  | 98.1  |
| Nb <sub>2</sub> O <sub>5</sub> | 1 <sup>st</sup> | 92.3                                                   | 91.0  | 88.7  |
|                                | 2 <sup>nd</sup> | 98.9                                                   | 99.5  | 97.9  |
|                                | 3 <sup>rd</sup> | 99.5                                                   | 99.5  | 99.1  |

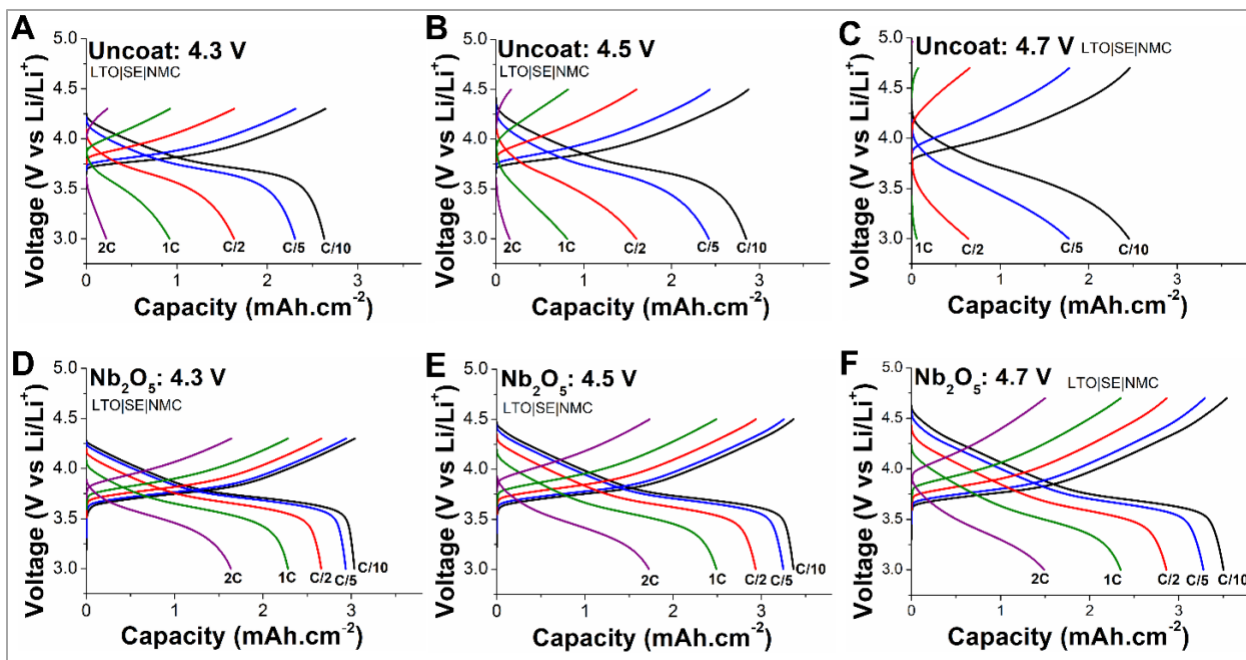

Figure S9: Voltage profiles at different C-rates (C/10, C/5, C/2, 1C, 2C) for (A-C) uncoated and (D-F) Nb<sub>2</sub>O<sub>5</sub> coated SC-NMC composite cathodes (LTO|SE|NMC) cycled at different cutoff voltages.

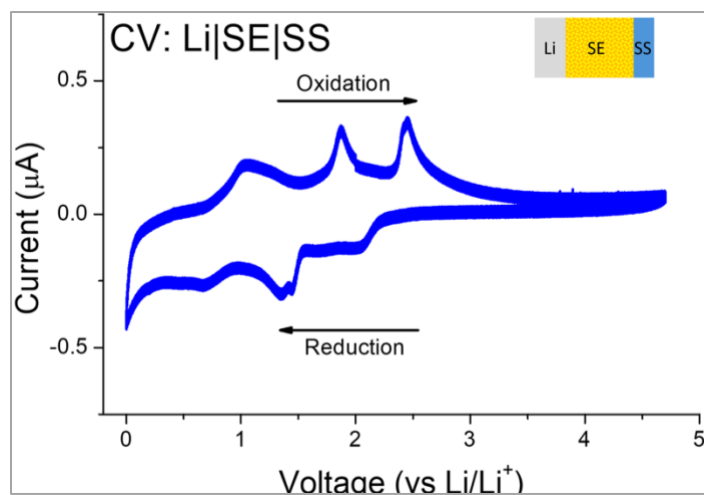

Figure S10: Cyclic voltammogram of a Li|Li<sub>6</sub>PS<sub>5</sub>Cl|SS blocking electrode at a 0.1 mV·s<sup>-1</sup> scan rate between 0 and 4.7 V (vs Li/Li<sup>+</sup>) showing instability and degradation of Li<sub>6</sub>PS<sub>5</sub>Cl solid electrolyte.

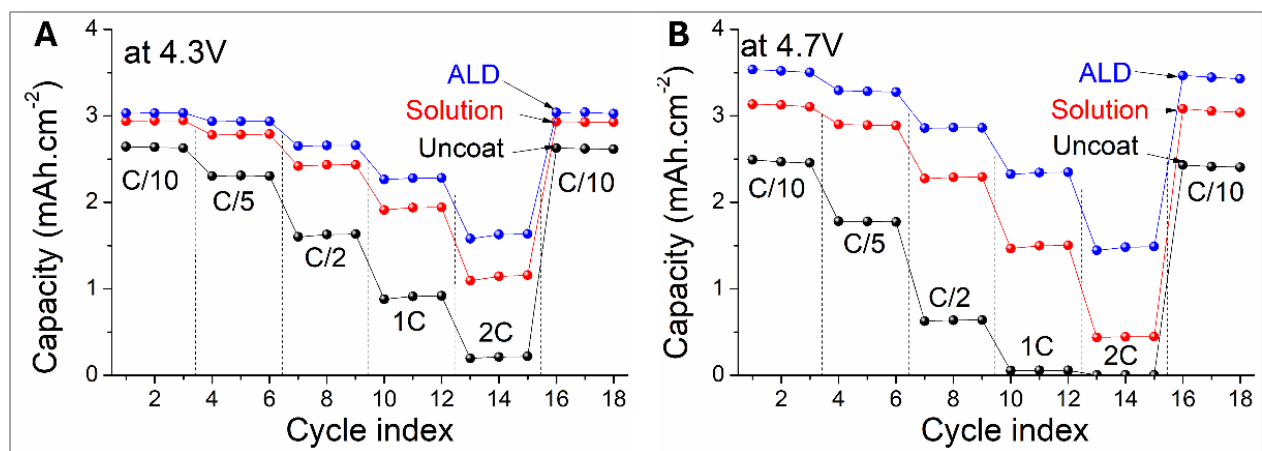

Figure S11: Rate capability trends of uncoated, ALD Nb<sub>2</sub>O<sub>5</sub>-coated, and solution-processed LiNbO<sub>3</sub> coated SC-NMC composite cathodes (LTO|SE|NMC) at (A) 4.3 V and (B) 4.7 V cutoff voltages.



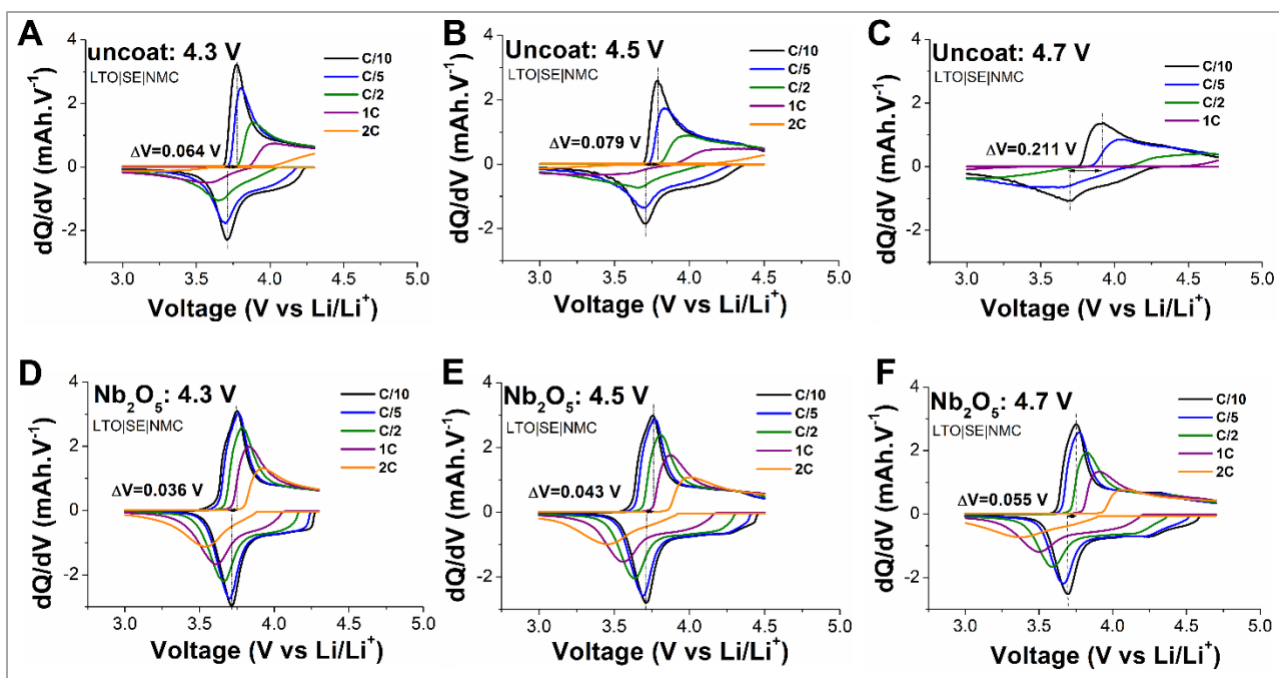

Figure S12:  $dQ/dV$  vs  $V$  plots obtained from the voltage profiles during rate capability tests of (A-C) uncoated and (D-F)  $Nb_2O_5$ -coated SC-NMC composite cathodes (LTO|SE|NMC) cycled at different cutoff voltages.

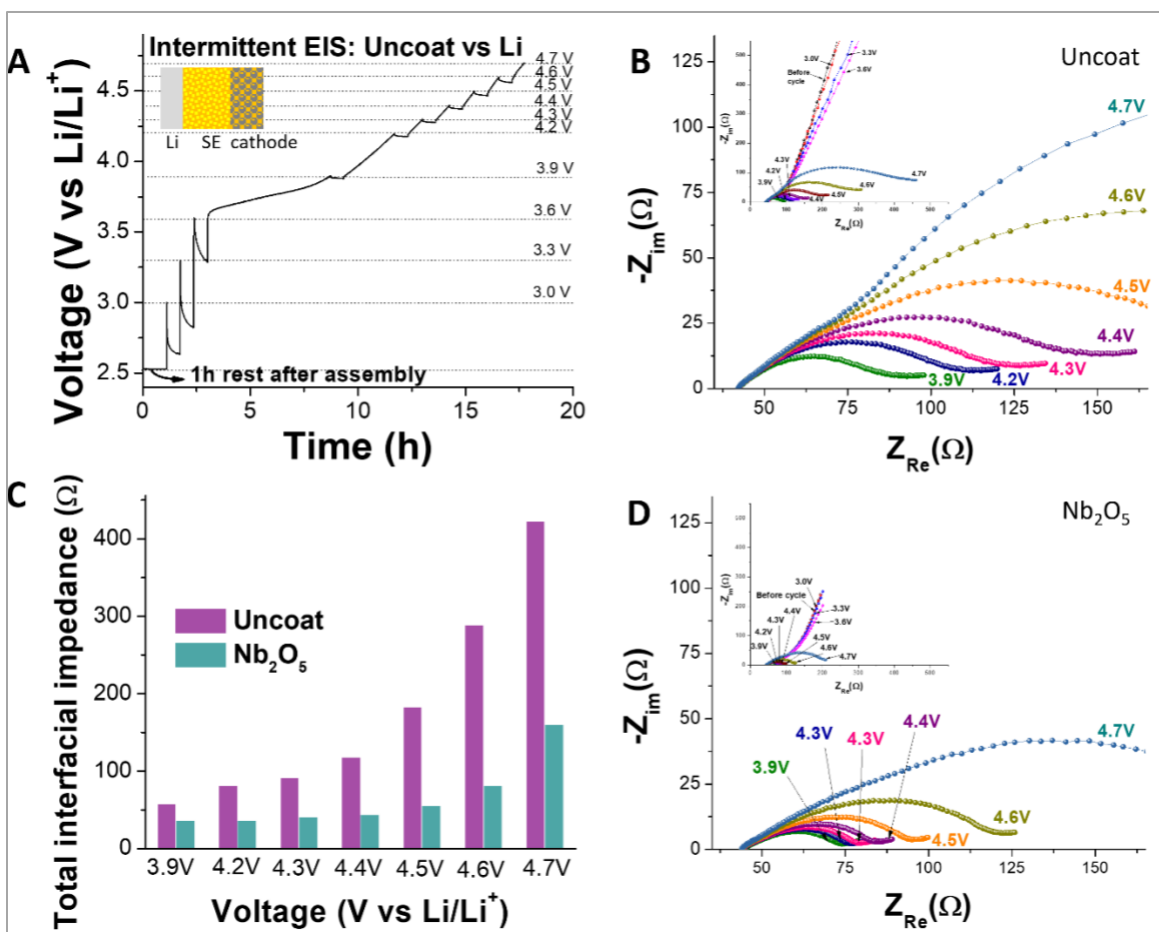

Figure S13: (A) Intermittent EIS measurement at specific voltage points during the charging cycle (at C/10 rate) of uncoated and  $Nb_2O_5$ -coated cathodes (Li|SE|NMC). Zoomed-in view of Nyquist plots obtained at different voltage points during the charging cycle are presented for (B) uncoated and (D)  $Nb_2O_5$ -coated cathodes, with insets providing a zoomed-out view of the Nyquist plots. (C) Comparison of total interfacial impedance at different voltage points during charging.

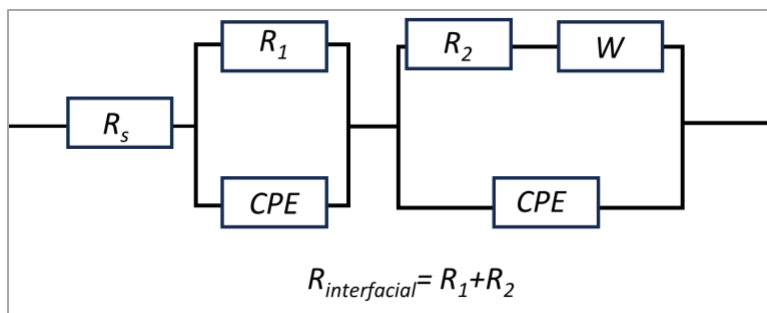

Figure S14: Equivalent circuit used for fitting the Nyquist impedance plots.

**Table S4:** Fitted impedance components:

| Voltage limit | Uncoat             |                    |                    |                                                                | Nb <sub>2</sub> O <sub>5</sub> |                    |                    |                                                                |
|---------------|--------------------|--------------------|--------------------|----------------------------------------------------------------|--------------------------------|--------------------|--------------------|----------------------------------------------------------------|
|               | R <sub>s</sub> (Ω) | R <sub>1</sub> (Ω) | R <sub>2</sub> (Ω) | R <sub>Interfacial</sub> (Ω) (R <sub>1</sub> +R <sub>2</sub> ) | R <sub>s</sub> (Ω)             | R <sub>1</sub> (Ω) | R <sub>2</sub> (Ω) | R <sub>Interfacial</sub> (Ω) (R <sub>1</sub> +R <sub>2</sub> ) |
| 4.3 V         | 49.2               | 133.4              | 366.2              | 499.6                                                          | 46.9                           | 32.9               | 54.7               | 87.5                                                           |
| 4.5 V         | 47.1               | 289.1              | 356.5              | 654.6                                                          | 60.0                           | 28.6               | 56.9               | 85.3                                                           |
| 4.7 V         | 51.3               | 547.3              | 805.0              | 1352.4                                                         | 43.3                           | 84.6               | 74.5               | 159.1                                                          |

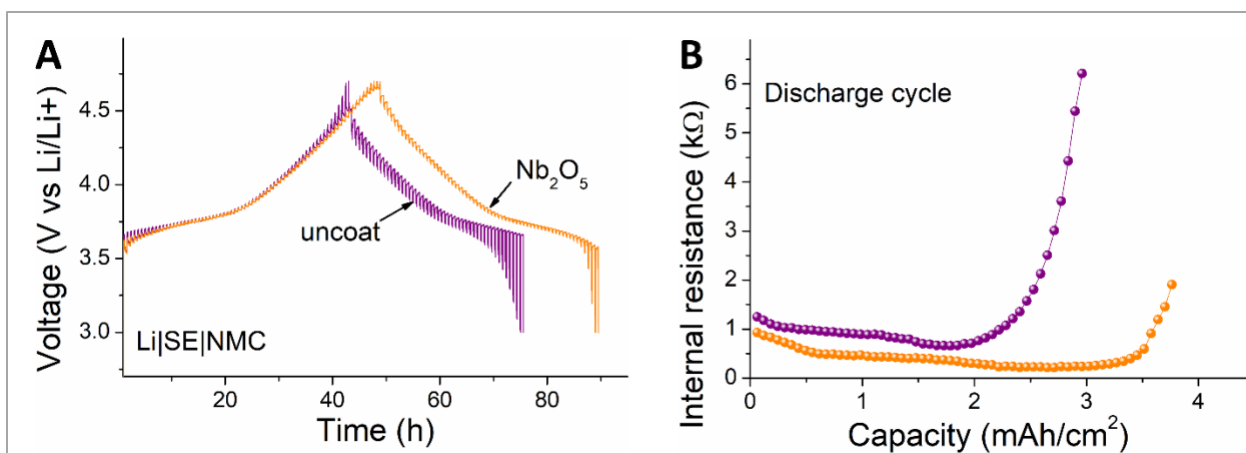

Figure S15: (A) Voltage trends during GITT experiments of uncoated and Nb<sub>2</sub>O<sub>5</sub>-coated cathodes (Li|SE|NMC). (B) Internal resistance during discharge half cycles estimated from the voltage profiles obtained during the GITT experiments. The GITT experiments were performed with Li|SE|NMC cells by applying a current pulse equivalent to C/10 rate for 10 min followed by a 30 min open circuit rest.

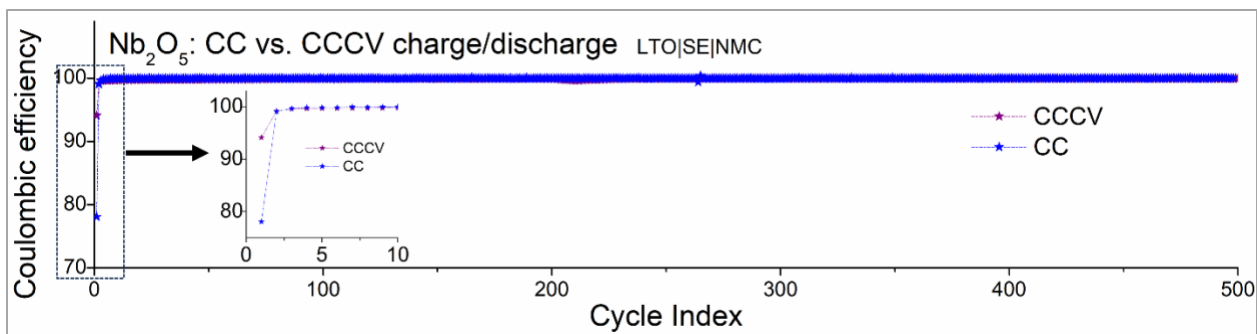

Figure S16: (A) Coulombic efficiency of Nb<sub>2</sub>O<sub>5</sub>-coated SC-NMC cathodes (LTO|SE|NMC) at 1C rate cycled with a 4.7 V limit using CC and CCCV charge/discharge protocols. (Inset) Coulombic efficiency during the first 10 cycles.

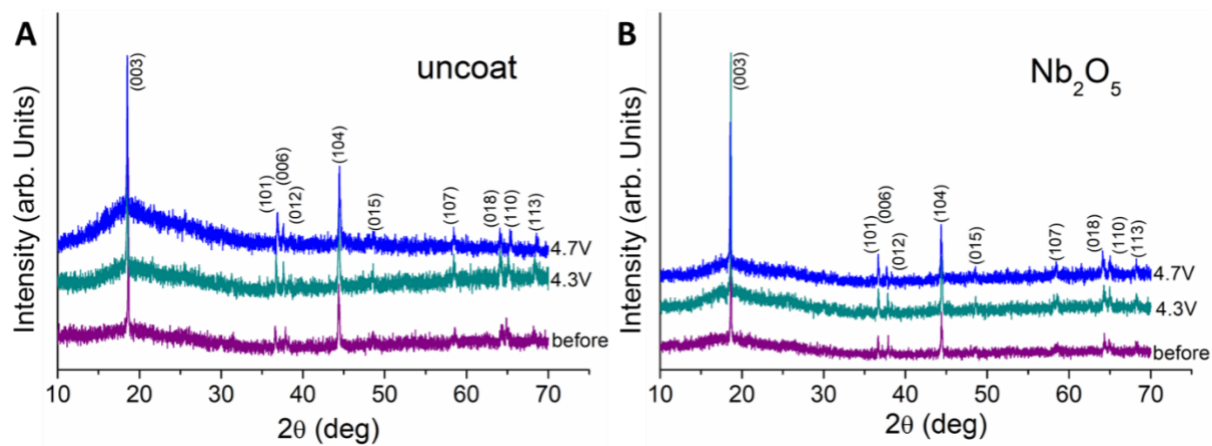

Figure S17: *Ex-situ* XRD scans of recorded at the cathode sides of the pressed LTO|SE|NMC cells before cycling and after the rate capability tests performed with 4.3 V and 4.7 V limits for (A) uncoated and (B) Nb<sub>2</sub>O<sub>5</sub>-coated SC-NMC samples.

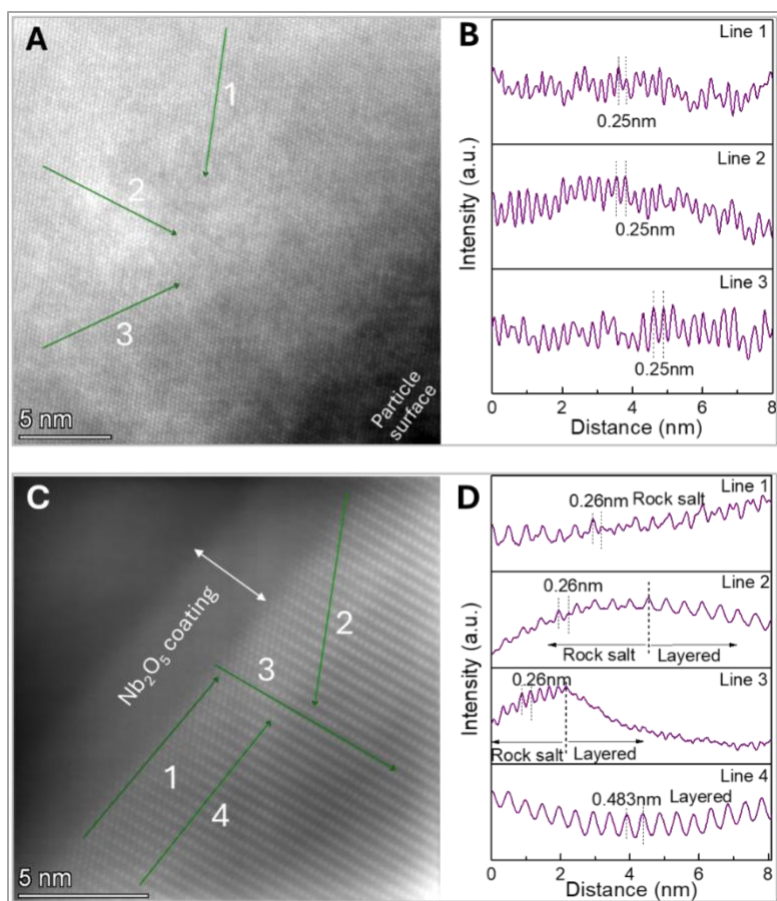

Figure S18: Intensity line profiles on TEM images obtained from (A,B) uncoated and (C,D) Nb<sub>2</sub>O<sub>5</sub>-coated samples (LTO|SE|NMC) cycled for 500 cycles at 1C and 4.7 V showing interplanar spacing along different crystallographic directions.

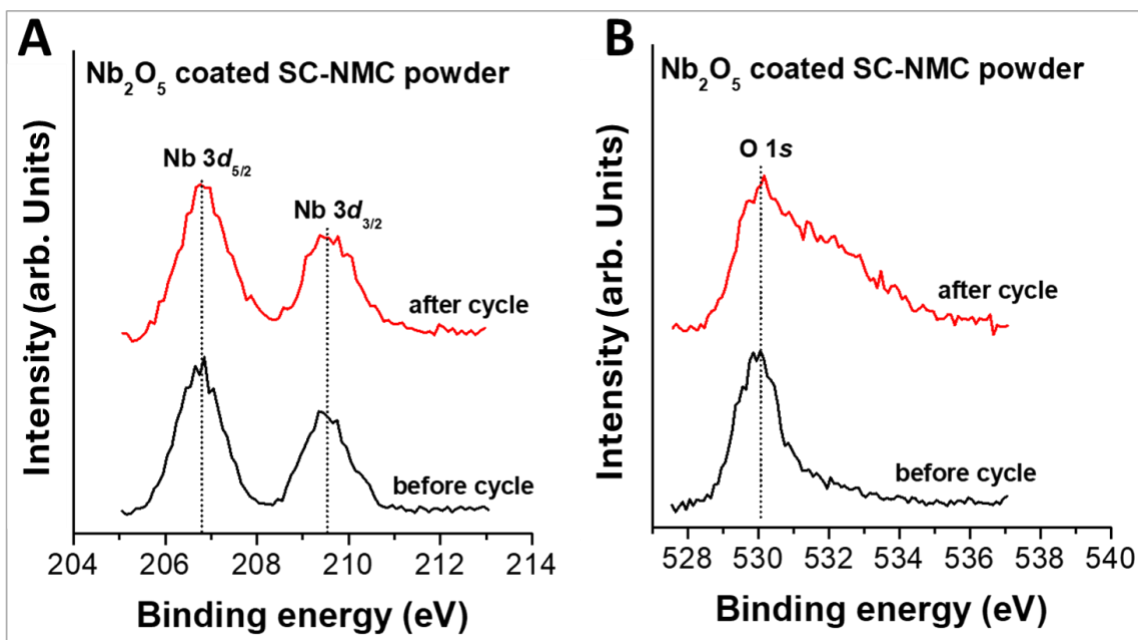

Figure S19: XPS core scans corresponding to (A) Nb 3d peak (B) O 1s peak from Nb<sub>2</sub>O<sub>5</sub>-coated SC-NMC powders before cycling and after cycling.



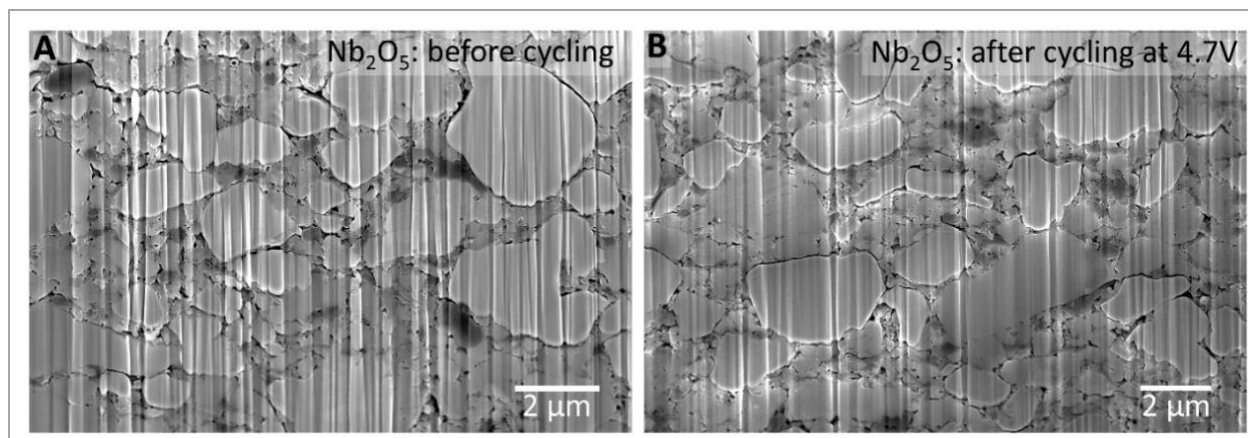

Figure S20: FIB-SEM cross-section images of Nb<sub>2</sub>O<sub>5</sub>-coated SC-NMC electrodes (A) before cycling and (B) after 500 cycles (LTO|SE|NMC) tested at 1C rate with a 4.7 V limit.

**Table S5:** Comparison of electrochemical performance of layered cathode materials having different coatings in solid electrolyte and liquid electrolyte systems.

| Coating material                                                 | Coating Thickness | Coating method | Cathode material                                                         | Electrolyte                                                                           | Anode | Upper Voltage limit (V vs Li/Li <sup>+</sup> ) | 1 <sup>st</sup> cycle CE (Voltage limit, current density) | Capacity retention as % (voltage limit, C-rate, after cycles) | Ref           |
|------------------------------------------------------------------|-------------------|----------------|--------------------------------------------------------------------------|---------------------------------------------------------------------------------------|-------|------------------------------------------------|-----------------------------------------------------------|---------------------------------------------------------------|---------------|
| Al <sub>2</sub> O <sub>3</sub>                                   | 0.4-1.4 nm        | ALD            | LiNi <sub>0.5</sub> Mn <sub>1.5</sub> O <sub>4</sub>                     | Li <sub>6</sub> PS <sub>5</sub> Cl                                                    | Li-In | 4.4V (5.0V)                                    | 86.5% (5.0V, 0.2C, 100 cycles)                            | 70.1% (5.0V, 0.2C, 100 cycles)                                | <sup>2</sup>  |
| ZrO <sub>2</sub>                                                 | 4-5 nm            | ALD            | LiNi <sub>0.85</sub> Co <sub>0.1</sub> Mn <sub>0.5</sub> O <sub>2</sub>  | Li <sub>6</sub> PS <sub>5</sub> Cl                                                    | LTO   | 2.75V (4.3V)                                   | ~91% (4.3V, 0.1C)                                         | 78% (4.3V, 0.5C, 200 cycles)                                  | <sup>3</sup>  |
| HfO <sub>2</sub>                                                 | 2-3nm             | ALD            | LiNi <sub>0.85</sub> Co <sub>0.1</sub> Mn <sub>0.5</sub> O <sub>2</sub>  | Li <sub>6</sub> PS <sub>5</sub> Cl                                                    | Li    | 4.3V                                           | ~88% (4.3V, 0.1C)                                         | 82% (4.3V, 0.5C, 60 cycles)                                   | <sup>4</sup>  |
| LiNbO <sub>3</sub>                                               | 2-5 nm            | Solution       | LiNi <sub>0.82</sub> Co <sub>0.12</sub> Mn <sub>0.6</sub> O <sub>2</sub> | Li <sub>6</sub> PS <sub>5</sub> Cl                                                    | Li-In | 3.7V (4.32)<br>3.9V (4.52 V)                   | 71.8% (4.32V, 8.5 mA/g)                                   | 82.1% (4.52V, 34 mA/g, 30 cycles)                             | <sup>5</sup>  |
| LiNbO <sub>3</sub>                                               | 10-20nm           | Solution       | LiNi <sub>0.5</sub> Mn <sub>1.5</sub> O <sub>4</sub>                     | Li <sub>6</sub> PS <sub>5</sub> Cl / Li <sub>3</sub> YCl <sub>6</sub>                 | Li-In | 4.25V (4.85 V)                                 | 91.2% (4.85V, 7.5 mA/g)                                   | ~50% (4.85V, 20mA/g, 50 cycles)                               | <sup>6</sup>  |
| LiNbO <sub>x</sub>                                               | 4 nm              | ALD            | LiNi <sub>0.8</sub> Co <sub>0.1</sub> Mn <sub>0.1</sub> O <sub>2</sub>   | Li <sub>10</sub> GeP <sub>2</sub> S <sub>12</sub>                                     | LTO   | 2.8V (4.35 V)                                  | 80.6% (4.35V, 0.1C)                                       | 76.3% (4.35V, 0.3C, 400 cycles)                               | <sup>7</sup>  |
| Li <sub>3</sub> BO <sub>3</sub>                                  | 1-11 nm           | Solution       | LiCoO <sub>2</sub>                                                       | Li <sub>6</sub> PS <sub>5</sub> Cl                                                    | Li-In | 3.68V (4.3V)<br>3.88V (4.5V)                   | 91% (4.3V)                                                | 88.7% (4.5V, 0.2C, 25cycles)                                  | <sup>8</sup>  |
| Li <sub>3</sub> BO <sub>3</sub> -Li <sub>2</sub> CO <sub>3</sub> | 21-30 nm          | Solution       | LiCoO <sub>2</sub>                                                       | Li <sub>6</sub> PS <sub>5</sub> Cl                                                    | Li-In | 3.68V (4.3V)<br>3.88V (4.5V)                   | 93% (4.3V)                                                | 93.8% (4.5V, 0.2C, 25cycles)                                  | <sup>8</sup>  |
| LiTaO <sub>x</sub>                                               | 2-6 nm            | Solution       | LiNi <sub>0.82</sub> Co <sub>0.12</sub> Mn <sub>0.6</sub> O <sub>2</sub> | Li <sub>6</sub> PS <sub>5</sub> Cl                                                    | Li-In | 3.7V (4.32)<br>3.9V (4.52 V)                   | 76.1% (4.32V, 8.5 mA/g)                                   | 83% (4.52V, 30 cycles)                                        | <sup>5</sup>  |
| Li <sub>3</sub> PO <sub>4</sub>                                  | 1-10 nm           | ALD            | LiNi <sub>0.8</sub> Co <sub>0.1</sub> Mn <sub>0.1</sub> O <sub>2</sub>   | Li <sub>10</sub> GeP <sub>2</sub> S <sub>12</sub>                                     | In    | 3.88V (4.5V)                                   | 75.1% (4.5V, 0.1C)                                        | 78% (4.4V, 0.2C, 100 cycles)                                  | <sup>9</sup>  |
| Li <sub>2</sub> ZrO <sub>3</sub>                                 | <10 nm            | Solution       | LiNi <sub>0.82</sub> Co <sub>0.12</sub> Mn <sub>0.6</sub> O <sub>2</sub> | Li <sub>6</sub> PS <sub>5</sub> Cl                                                    | LTO   | 2.85V (4.4V)                                   | 86% (4.4V, 0.2C)                                          | ~70% (4.4V, 0.1C, 60 cycles)                                  | <sup>10</sup> |
| LiWO <sub>3</sub>                                                | 2-4 nm            | Solution       | LiNi <sub>0.6</sub> Co <sub>0.2</sub> Mn <sub>0.2</sub> O <sub>2</sub>   | 75Li <sub>2</sub> S-22P <sub>2</sub> S <sub>5</sub> -3Li <sub>2</sub> SO <sub>4</sub> | Li-In | 3.88V (4.5V)                                   | 64.4% (4.5V, 0.05C)                                       | 83% (4.5V, 0.1C, 30 cycles)                                   | <sup>11</sup> |
| Li <sub>x</sub> Al <sub>y</sub> Zn <sub>z</sub> O <sub>δ</sub>   | ~4 nm             | ALD            | LiNiO <sub>2</sub>                                                       | Li <sub>6</sub> PS <sub>5</sub> Cl                                                    | Li-In | 4.3V                                           | 85.4% (4.3V, 0.2C)                                        | 83.1% (4.3V, 0.2C)                                            | <sup>12</sup> |

|                                       |               |                |                                                                                           |                                    |       |      |                      |                                           |               |
|---------------------------------------|---------------|----------------|-------------------------------------------------------------------------------------------|------------------------------------|-------|------|----------------------|-------------------------------------------|---------------|
|                                       |               |                |                                                                                           |                                    |       |      |                      | 0.2C, 200 cycles)                         |               |
| LiAl(PO <sub>3</sub> ) <sub>4</sub>   | 4nm           | ALD            | LiNi <sub>0.88</sub> Co <sub>0.09</sub> Mn <sub>0.03</sub> O <sub>2</sub>                 | Li <sub>6</sub> PS <sub>5</sub> Cl | Li-In | 4.3V | 84.1%, 4.3V, C/5     | 98.3%, 440 cycles 20.1 mg/cm <sup>2</sup> | <sup>13</sup> |
| CoO/Li <sub>2</sub> CO <sub>3</sub>   | 4nm           | Heat treatment | LiCoO <sub>2</sub>                                                                        | Li <sub>6</sub> PS <sub>5</sub> Cl | Li-In | 4.6V | 83%, 4.3V, C/2       | 83%, 150 cycles, C/2                      | <sup>14</sup> |
| Gd <sub>2</sub> O <sub>3</sub>        | 7 nm          | Solution       | LiNi <sub>0.6</sub> Co <sub>0.05</sub> Mn <sub>0.35</sub> O <sub>2</sub>                  | Liquid                             | Li    | 4.5V | ~83% (4.5V, 0.1C)    | 88.1% (4.5V, 1C, 400 cycles)              | <sup>15</sup> |
| Sm <sub>2</sub> O <sub>3</sub>        | 13 nm         | Solution       | LiNi <sub>0.6</sub> Co <sub>0.05</sub> Mn <sub>0.35</sub> O <sub>2</sub>                  | Liquid                             | Li    | 4.5  | ~82% (4.5V, 0.1C)    | 97.0 % (4.5V, 1C, 300 cycles)             | <sup>16</sup> |
| Al <sub>2</sub> O <sub>3</sub>        | 1-4 nm        | ALD            | LiNi <sub>0.6</sub> Co <sub>0.2</sub> Mn <sub>0.2</sub> O <sub>2</sub>                    | Liquid                             | Li    | 4.7V | ~85%(4.7V, 0.5C)     | 89.5% (4.7V, 0.5C, 45 cycles)             | <sup>17</sup> |
| ZrO <sub>2</sub>                      | Not available | Ball mill      | Li <sub>1.2</sub> Ni <sub>0.13</sub> Co <sub>0.13</sub> Mn <sub>0.54</sub> O <sub>2</sub> | Liquid                             | Li    | 4.8V | 82.5 (4.8V, 0.1C)    | 89.0% (4.8V, 1C, 100 cycles)              | <sup>18</sup> |
| Li <sub>3</sub> PO <sub>4</sub>       | 20 nm         | Solution       | LiCoO <sub>2</sub>                                                                        | Liquid                             | Li    | 4.5V | 87.3% (4.5V, 0.1C)   | 90% (4.5V, 0.5C, 100 cycles)              | <sup>19</sup> |
| AlZnO                                 | 3nm           | solution       | LiCoO <sub>2</sub>                                                                        | Liquid                             | Li    | 4.6V | ~82% (4.6V, 37 mA/g) | 65.7% (4.6V, 185 mA/g, 500 cycles)        | <sup>20</sup> |
| Li <sub>0.5</sub> Mn <sub>0.5</sub> O |               | solution       | Li <sub>1.2</sub> Mn <sub>0.6</sub> Ni <sub>0.2</sub> O <sub>2</sub>                      | Liquid                             | Li    | 4.8V | 80.3% (4.8V, C/10)   | 80.7% after 200 cycles at 1 C             | <sup>21</sup> |

**Table S6:** List of abbreviations used in the study

|                                         |                                                      |
|-----------------------------------------|------------------------------------------------------|
| SSB: Solid-state battery                | SEI: Solid electrolyte interface                     |
| LIB: Li-ion battery                     | ASR: Area-specific resistance                        |
| EV: Electric vehicle                    | XPS: X-ray photoelectron spectroscopy                |
| SE: Solid electrolyte                   | FIB: Focused ion beam                                |
| LE: Liquid electrolyte                  | TEM: Transmission electron microscopy                |
| CAM: Cathode active material            | STEM: Scanning transmission electron microscopy      |
| NMC: Nickel manganese cobalt oxide      | EDS: Electron dispersive X-ray spectroscopy          |
| SC: Single crystal                      | HAADF: High-angle annular dark-field                 |
| LPSC: $\text{Li}_6\text{PS}_5\text{Cl}$ | XRD: X-ray diffraction                               |
| ALD: Atomic layer deposition            | EIS: Electrochemical impedance spectroscopy          |
| TM: Transition metal                    | GITT: Galvanostatic intermittent titration technique |
| PTFE: Polytetrafluoroethylene           | FFT: Fast Fourier transform                          |
| LTO: Lithium titanate                   | CC: Constant current                                 |
| CEI: Cathode electrolyte interface      | CV: Constant voltage                                 |
| ICE: Initial Coulombic efficiency       | CCCV: Constant current constant voltage              |

## Supplementary References:

1. Zhang, L., Zhang, C., Li, N. & Tong, W. Influence of Charge Cutoff Voltage on the Cycling Behavior of LiNi<sub>0.5</sub>Mn<sub>0.3</sub>Co<sub>0.2</sub>O<sub>2</sub> Cathode. *J Electrochem Soc* **167**, 120509 (2020).
2. Lee, H. J. *et al.* LiNi<sub>0.5</sub>Mn<sub>1.5</sub>O<sub>4</sub> Cathode Microstructure for All-Solid-State Batteries. *Nano Lett* **22**, 7477–7483 (2022).
3. Kitsche, D. *et al.* Atomic Layer Deposition Derived Zirconia Coatings on Ni-Rich Cathodes in Solid-State Batteries: Correlation Between Surface Constitution and Cycling Performance. *Small Science* **3**, 1–12 (2023).
4. Kitsche, D. *et al.* High Performance All-Solid-State Batteries with a Ni-Rich NCM Cathode Coated by Atomic Layer Deposition and Lithium Thiophosphate Solid Electrolyte. *ACS Appl Energy Mater* **4**, 7338–7345 (2021).
5. Lee, J. S. & Park, Y. J. Comparison of LiTaO<sub>3</sub> and LiNbO<sub>3</sub> Surface Layers Prepared by Post- and Precursor-Based Coating Methods for Ni-Rich Cathodes of All-Solid-State Batteries. *ACS Appl Mater Interfaces* **13**, 38333–38345 (2021).
6. Jang, J. *et al.* Enabling a Co-Free, High-Voltage LiNi<sub>0.5</sub>Mn<sub>1.5</sub>O<sub>4</sub> Cathode in All-Solid-State Batteries with a Halide Electrolyte. *ACS Energy Lett* **7**, 2531–2539 (2022).
7. Liu, X. *et al.* Constructing a High-Energy and Durable Single-Crystal NCM811 Cathode for All-Solid-State Batteries by a Surface Engineering Strategy. *ACS Appl Mater Interfaces* **13**, 41669–41679 (2021).
8. Jung, S. H. *et al.* Li<sub>3</sub>BO<sub>3</sub>-Li<sub>2</sub>CO<sub>3</sub>: Rationally Designed Buffering Phase for Sulfide All-Solid-State Li-Ion Batteries. *Chem Mater* **30**, 8190–8200 (2018).
9. Deng, S. *et al.* Dual-functional Interfaces for Highly Stable Ni-Rich Layered Cathodes in Sulfide All-Solid-State Batteries. *Energy Storage Mater* **27**, 117–123 (2020).
10. Strauss, F. *et al.* LiZrO<sub>3</sub>-coated NCM622 for Application in Inorganic Solid-State Batteries: Role of Surface Carbonates in the Cycling Performance. *ACS Appl Mater Interfaces* **12**, 57146–57154 (2020).
11. Lim, C. B. & Park, Y. J. Precursor-based Surface Modification of Cathodes using Ta and W for Sulfide-Based All-Solid-State Batteries. *Sci Rep* **10**, 1–12 (2020).
12. Wang, L. *et al.* High-energy All-Solid-State Lithium Batteries Enabled by Co-Free LiNiO<sub>2</sub> Cathodes with Robust Outside-in Structures. *Nat Nanotechnol* **19**, 208–218 (2024).
13. Zhou, X. *et al.* High-Performance Sulfide All-Solid-State Batteries Enabled by High-Voltage Ni-Rich Cathode with a Conformal and Conductive Protective Layer. *ACS Appl Energy Mater* **7**, 2524–2532 (2024).
14. Zheng, S. *et al.* Surface Reconstruction Layer Boosting Interfacial Stability of LiCoO<sub>2</sub>/Li<sub>6</sub>PS<sub>5</sub>Cl in Bulk All-Solid-State Li Batteries. *J Mater Chem A Mater* **12**, 7916–7922 (2024).
15. Shen, Y. *et al.* A Universal Multifunctional Rare Earth Oxide Coating to Stabilize High-Voltage Lithium Layered Oxide Cathodes. *Energy Storage Mater* **56**, 155–164 (2023).

16. Shen, Y. *et al.* Stabilization of High-Voltage Layered Oxide Cathode by Multi-Electron Rare Earth Oxide. *Chem Eng J* **454**, 140249 (2023).
17. Wang, X., Cai, J., Liu, Y., Han, X. & Ren, Y. Atomic-scale Constituting Stable Interface. *Nanotechnology* **32**, 115401 (2021).
18. Cao, J. *et al.* Enhanced Electrochemical Performances of  $\text{Li}_{1.2}\text{Ni}_{0.13}\text{Co}_{0.13}\text{Mn}_{0.54}\text{O}_2$  Cathode Material Coated with  $\text{ZrO}_2$ . *Ironics* **29**, 51–60 (2023).
19. Ji, Y. *et al.*  $\text{LiCoO}_2$  Cathode Surface Modification with Optimally Structured  $\text{Li}_3\text{PO}_4$  for Outstanding High-Voltage Cycling Performance. *Nanoscale* **15**, 11898–11908 (2023).
20. Cheng, T. *et al.* Achieving Stable Cycling of  $\text{LiCoO}_2$  at 4.6 V by Multilayer Surface Modification. *Adv Funct Mater* **31**, 1–8 (2021).
21. Zhu, A. *et al.* In-situ formation of  $\text{Li}_{0.5}\text{Mn}_{0.5}\text{O}$  Coating Layer Through Defect Controlling for High Performance Li-Rich Manganese-Based Cathode Material. *J Energy Chem* **71**, 384–391 (2022).
